# Supplementary material for: SCX-tip-aided LC-MS detection of active ricinviaoligonucleotide substrates for depurination kinetics
Source: Royal Society of Chemistry journal article supplement (doi:10.1039/d3an00217a), 2023-01-01
Supplement: d3an00217a1.pdf [file d3an00217a1.pdf]

Supporting Information for

## **SCX-tip aided LC-MS detection of active ricin via oligonucleotide substrate for depurination kinetics**

Zhifang Yang,<sup>#a</sup> Chenyu Wang,<sup>#ab</sup> Lan Xiao,<sup>ab</sup> Chuang Wang,<sup>ab</sup> Li Tang<sup>b</sup>, Lei Guo,<sup>\*a</sup> and Jianwei Xie<sup>a</sup>

---

<sup>a</sup> State Key Laboratory of Toxicology and Medical Countermeasures, and Laboratory of Toxicant Analysis, Institute of Pharmacology and Toxicology, Academy of Military Medical Sciences, Beijing, 100850, China.

<sup>b</sup> Key Laboratory of Ethnomedicine Ministry of Education (Minzu University of China), School of Pharmacy, Minzu University of China

† Electronic Supplementary Information (ESI) is available.

# These authors contributed equally to this work.

\*To whom correspondence should be addressed.

Prof. Li Tang

E-mail: tangli6972@muc.edu.cn

Prof. Lei Guo

E-mail: guolei@bmi.ac.cn

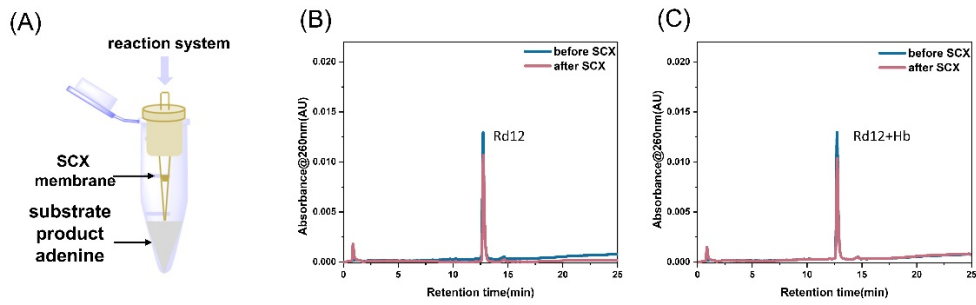

**Fig. S1** (A) Diagram of SCX membrane device (A), the effect of pretreatment and pretreatment on peak area and retention time of Rd12 (B) alone, or Rd12 and hemoglobin (Hb)(C).

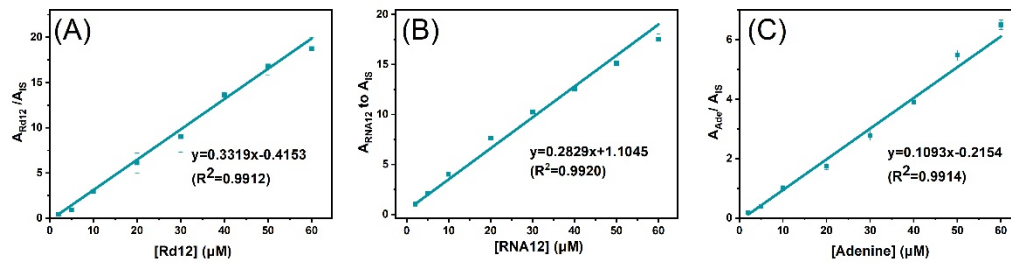

**Fig. S2** Linear curves of Rd12, RNA12, and adenine in LC-TUV-QDa detection. The peak area of the analyte or IS (r(GCGGGGCGC)) was collected from the QDa channel. The MW of IS was 3229.992, and the employed concentration was 2  $\mu$ M.

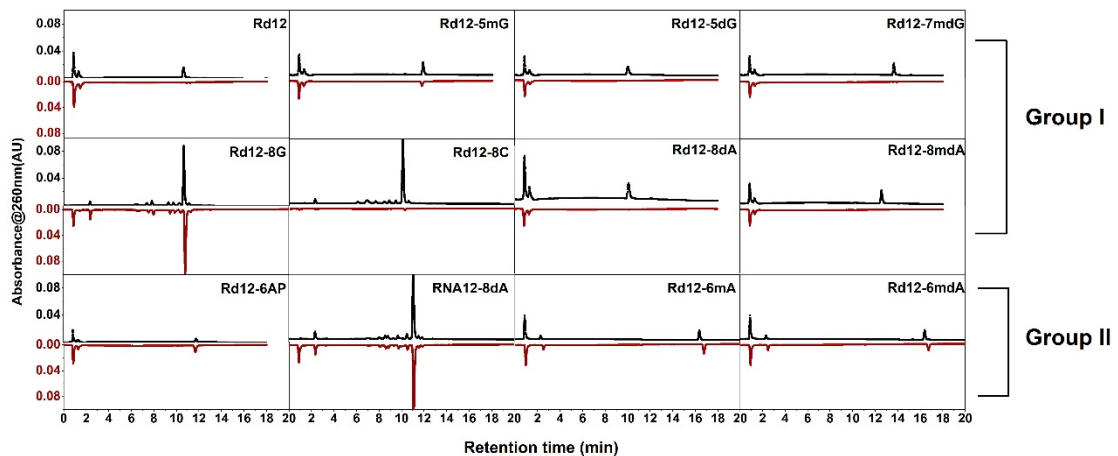

**Fig. S3** The chromatograms of Rd-based oligos before and after reaction with ricin in LC-TUV-QDa, where the TUV channel was shown, and Rd12 was used as the positive control.

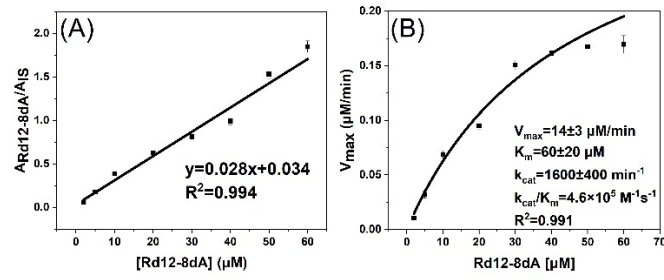

**Fig. S4** (A) The linear curve of Rd12-8dA; (B) the enzymatic kinetic curve of Rd12-8dA with ricin at pH 4.0.

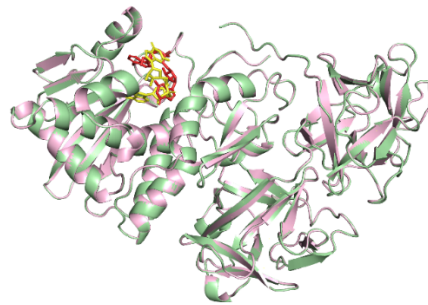

**Fig. S5** The alignment between the crystal structure of ricin with dinucleotide ApG (PDB: 3RTJ) and molecular docking of ricin (the model in our work) with a dinucleotide ApG.

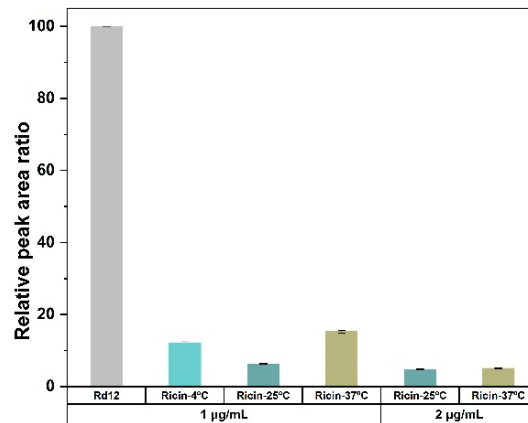

**Fig. S6** The relative peak area ratio of Rd12 substrate before and after reaction with ricin in LC-TUV. Conditions: 20 μM Rd12, 1 μg/mL (16 nM) or 2 μg/mL ricin in PBS at pH 7.4.

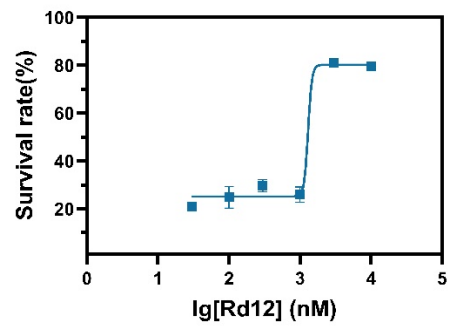

**Fig. S7** The cell survival rate curve with the increase of Rd12 concentration at pH 7.4.

**Table S1. The molecular docking of modified oligos and ricin at pH 4.0**

| <b>Oligo</b> | <b>Modified sites</b> | <b>Docking score<br/>(kcal/mol)</b> | <b>RMSD (Å)</b> | <b>Align RMSD(Å)</b> |
|--------------|-----------------------|-------------------------------------|-----------------|----------------------|
| Rd12-5mG     | -mGdAGA               | -181.8                              | 99.8            | 0                    |
| Rd12-5dG     | -dGdAGA               | -207.9                              | 99.8            | 0                    |
| Rd12-7mdG    | -GdAmdGA              | -180.2                              | 99.3            | 0                    |
| Rd12-8G      | -GdAGG                | -210.2                              | 99.2            | 0                    |
| Rd12-8C      | -GdAGC                | -237.5                              | 98.4            | 0                    |
| RNA12-8dA    | -GAGdA                | -183.1                              | 100.6           | 0                    |
| Rd12-8mdA    | -GdAGmdA              | -194.8                              | 99.4            | 0                    |
| Rd12-6AP     | -GdAPGA               | -209.9                              | 99.4            | 0                    |
| RNA12-6mA    | -GmAGA                | -200.5                              | 99.5            | 0                    |
| Rd12-6mdA    | -GmdAGA               | -195.9                              | 99.6            | 0                    |
| Rd12-8dA     | -GdAGdA               | -177.0                              | 100.8           | 0                    |
